# Supplementary material for: Tobacco Free Ireland 2025: SimSmoke prediction for the end game
Source: PubMed Central journal article supplement — Tob Prev Cessat. 2018 Jun 5;4:23. doi: 10.18332/tpc/91427 (PMC7205082; doi:10.18332/tpc/91427), 2018-06-05

## Appendix: Real price per package of 20 cigarettes in Ireland, 1998-2016

| Year                           | 1998 | 1999 | 2000 | 2001 | 2002 | 2003 | 2004 | 2005 | 2006 | 2007 | 2008 | 2009 | 2010 | 2011 | 2012 | 2013 | 2014 | 2015 | 2016 |
|--------------------------------|------|------|------|------|------|------|------|------|------|------|------|------|------|------|------|------|------|------|------|
| Retail price(€)                | 3.9  | 4.1  | 4.8  | 4.9  | 5.2  | 5.8  | 6.2  | 6.3  | 6.4  | 7.0  | 7.9  | 8.4  | 8.5  | 8.6  | 9.1  | 9.5  | 10.0 | 10.5 | 11.2 |
| CPI(year 1998=100)             | 100  | 102  | 107  | 113  | 118  | 122  | 125  | 128  | 133  | 139  | 145  | 138  | 137  | 140  | 143  | 144  | 144  | 143  | 143  |
| Real price(€) (base year=1998) | 3.9  | 4.0  | 4.5  | 4.3  | 4.4  | 4.8  | 4.9  | 4.9  | 4.8  | 5.0  | 5.4  | 6.0  | 6.2  | 6.1  | 6.4  | 6.6  | 6.9  | 7.3  | 7.8  |
| Real price change(%)           |      | 1.6  | 11.6 | -2.7 | 1.9  | 8.5  | 3.2  | -1.0 | -1.5 | 4.6  | 7.8  | 11.0 | 2.2  | -1.4 | 4.9  | 3.3  | 5.3  | 5.3  | 7.1  |

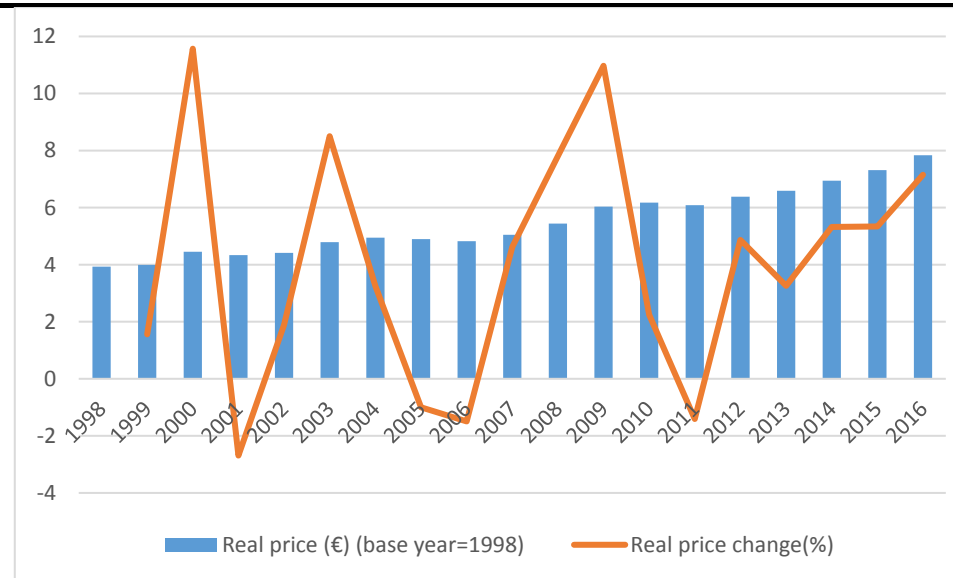

Supplement: TPC-4-23-s1.pdf [file TPC-4-23-s1.pdf]
